# Supplementary material
Source: publisher figshare collection journal article supplement (https://frontiersin.figshare.com/ndownloader/files/31085779)
Supplement: Supplementary file [file 31085779]

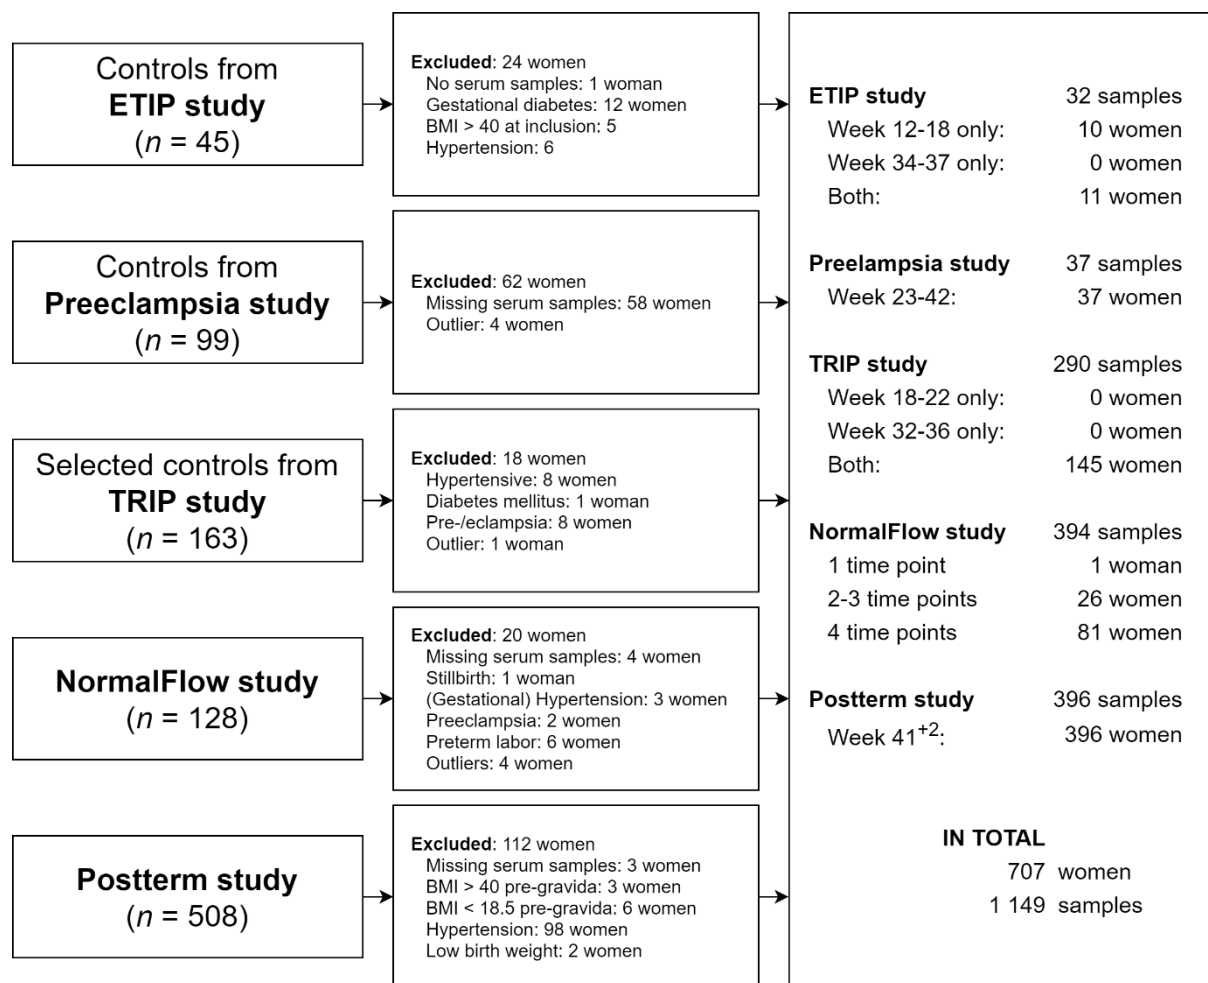

**Supplementary Figure 1. Flow chart of participant selection from five original cohorts.** In total, 943 women were assessed for inclusion as indicated, resulting in 707 unique women and 1149 serum samples included for analysis. Controls from the TRIP study were randomly selected from a larger pool of healthy control participants. ETIP, Exercise Training in Pregnancy for obese women. TRIP, Training in pregnancy.
